# Supplementary material for: Agonistic induction of PPARγ reverses cigarette smoke–induced emphysema
Source: JCI journal article supplement (doi:10.1172/jci70587), 2014-02-24
Supplement: sd1 [file 1]

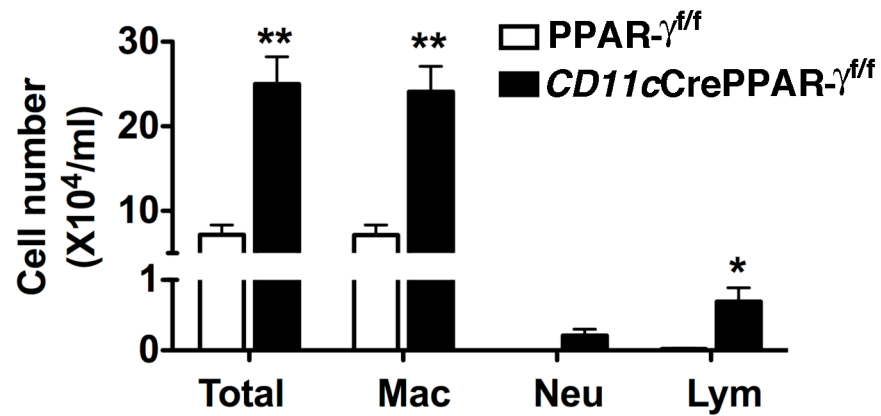

**Figure S1. Increased inflammatory cells infiltration in 2-month old PPAR- $\gamma$  deficient mice.**

Numbers of total cells, macrophages (Mac), lymphocytes (Lymph) and neutrophils (Neu) in BAL fluid from 2-month old PPAR- $\gamma^{f/f}$  and *CD11cCrePPAR- $\gamma^{f/f}$*  mice (n=5 in each group). Data are mean $\pm$ s.e.m. \*\*P<0.01, \*P<0.05 as determined by One-way ANOVA and Bonferroni's Multiple Comparison test.

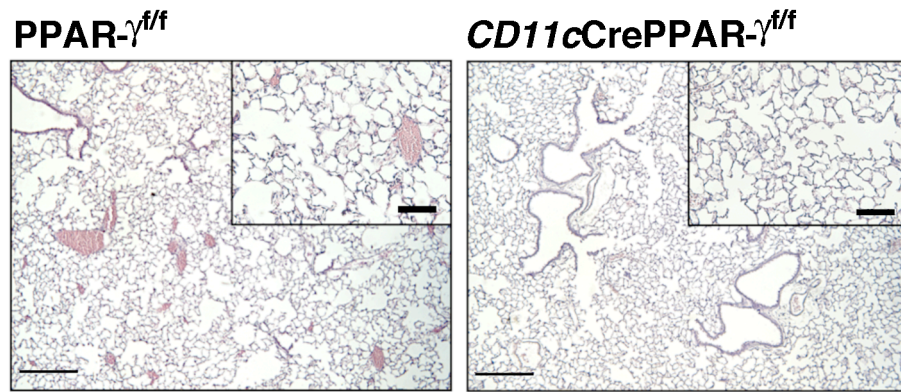

**Figure S2. Normal lung development in 2-month old PPAR- $\gamma$  deficient mice**

Hematoxylin and eosin (H&E) staining of formalin fixed 5 $\mu$ m lung sections showing normal lung development and no airway enlargement in 2-month old PPAR- $\gamma^{f/f}$  and *CD11cCrePPAR- $\gamma^{f/f}$*  mice. Data are representative of two independent studies with n=5 in each group. Scale bars: Bottom left 400 $\mu$ m; insets 100 $\mu$ m.

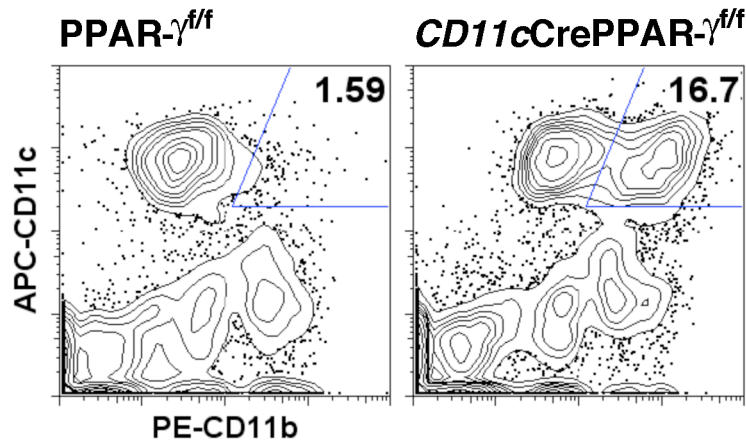

**Figure S3. Increased lung myeloid DCs infiltration in PPAR- $\gamma$  deficient mice**

Flow cytometry analysis of alveolar macrophage and myeloid DCs in 5-6 months old  $PPAR-\gamma^{f/f}$  and  $CD11cCrePPAR-\gamma^{f/f}$  mice. Increased relative expression of CD11b/CD11c is shown in the top right quadrant. One representative figure of at least five mice each group is shown.

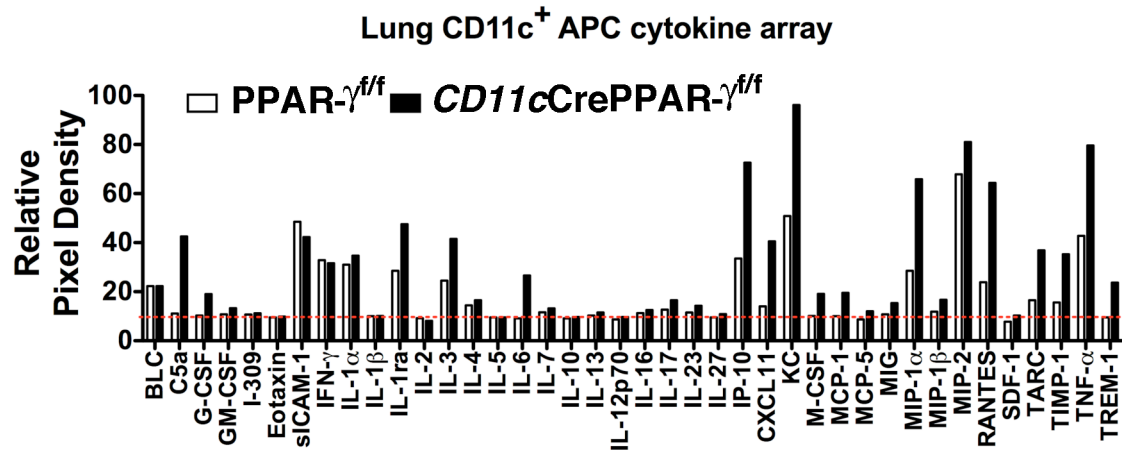

**Figure S4. Increase chemokine production by PPAR- $\gamma$  deficient APCs**

Lung CD11c<sup>+</sup> APCs isolated from 5-6 months old PPAR- $\gamma^{f/f}$  and *CD11cCre*PPAR- $\gamma^{f/f}$  mice were stimulated with (500ng/ml) LPS overnight. Relative production cytokines and chemokines were measured with mouse cytokine antibody array kit under manufacturer's instructions (Panel A, ARY006 R&D). The red dotted line represents background pixel density extracted from blot-based array assay. Data represent average of duplicate wells.

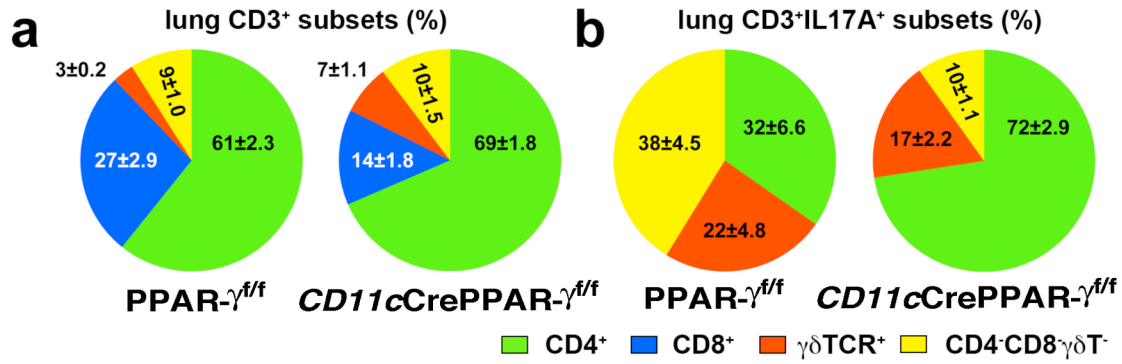

**Figure S5 Analysis of different T subsets and their contribution of IL-17A production**

(a) Pie graph showing the percentage of different CD3<sup>+</sup> T cell subsets from 5-6 months old PPAR-γ<sup>f/f</sup> and CD11cCrePPAR-γ<sup>f/f</sup> mice. Percentage was determined by flowcytometry. Data shown are mean±s.e.m. Data represent two independent studies (n=4 in each group per study). (b) Pie graph showing the contribution of IL-17A from different CD3<sup>+</sup> T cell subsets from PPAR-γ<sup>f/f</sup> and CD11cCrePPAR-γ<sup>f/f</sup> mice. Majority of IL-17A comes from CD4 T cells (Th17). Percentage was determined by flowcytometry. Data shown are mean±s.e.m. Data represent two independent studies (n=4 in each group per study).

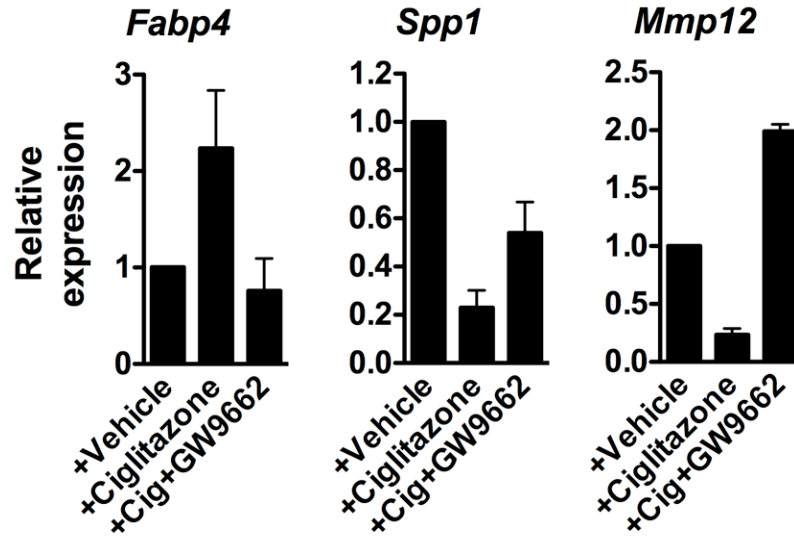

**Figure S6. PPAR $\gamma$  agonist treatment reverse *Spp1* expression in mouse emphysematous APCs.**

Lung APCs from smoke exposed mice were treated with vehicle (0.1%DMSO), ciglitazone (10 $\mu$ M) or ciglitazone+GW9662 (10 $\mu$ m) overnight. Expression of *Fabp4* (positive control) and *Spp1* were detected by quantitative PCR. (n=4).

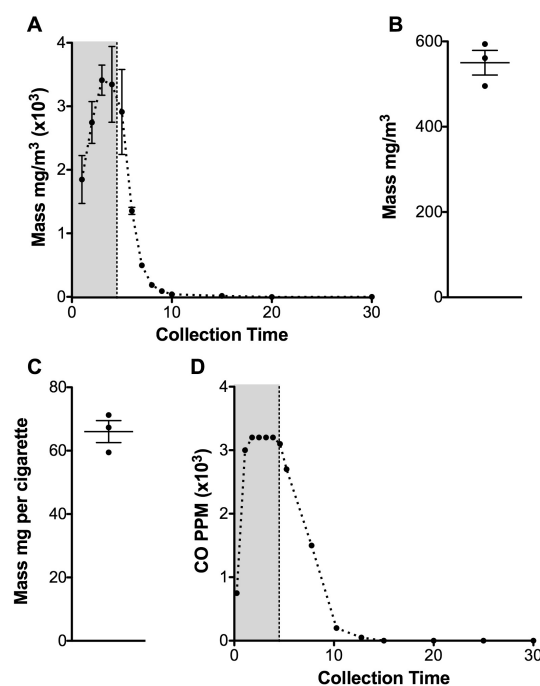

**Figure S7. Smoke chamber analyses of particulate matter and carbon monoxide during 30-minute smoke cycles of 1 cigarette.**

A) average gravimetric concentrations of particulates at indicated times in  $\text{mg}/\text{m}^3$  per cubic meter. B) Mean total particulate concentration of three 30-minute exposures was  $550 \pm 50 \text{ mg}/\text{m}^3$  ( $\pm \text{SD}$ ). C) Extrapolated  $\text{mg}/\text{cigarette}$  exposure based on sampling rate and total chamber flow rate. A-C data represent means  $\pm \text{SEM}$  of 3 cigarettes. D) CO concentration in parts per million (ppm, v/v) during one 30-minute smoke cycle experiment; average for entire run was 757 ppm. Panels A, D: gray shading indicates time in which the cigarette is burning, 4.5 to 5 minutes total.

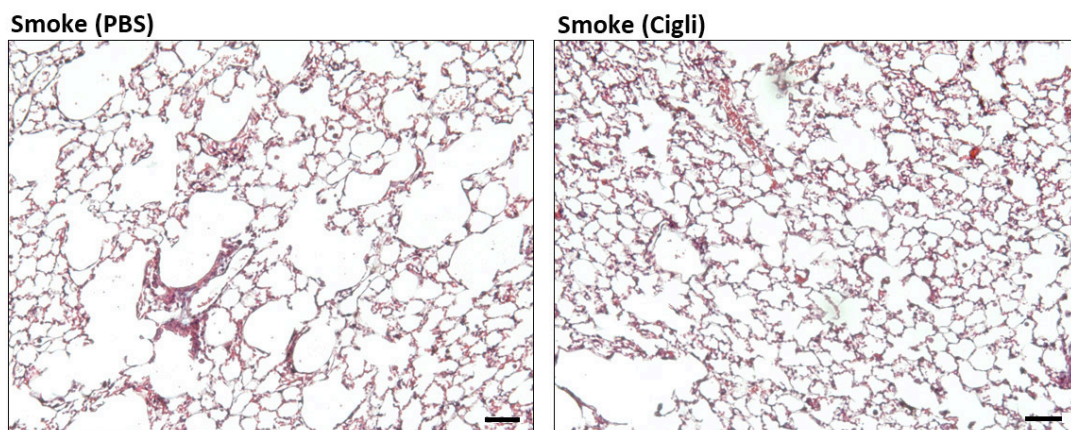

**Figure S8. Ciglitazone treatment in mice exposed to smoke does not induce fibrosis.**

Lung sections from WT (C57/BL6J) mice exposed to smoke and treated with vehicle (PBS) or ciglitazone (66.67  $\mu\text{g}/\text{ml}$ ) were stained using Mason-trichrome (Sigma) to detect collagen deposition and fibrosis. Compared to control mice (smoke/PBS), there was no evidence for increased collagen deposition, or fibrosis in the lungs of mice treated with ciglitazone (smoke/cigli). Data is representative of three independent studies that show similar results. Scale bar: 50 $\mu\text{m}$ .

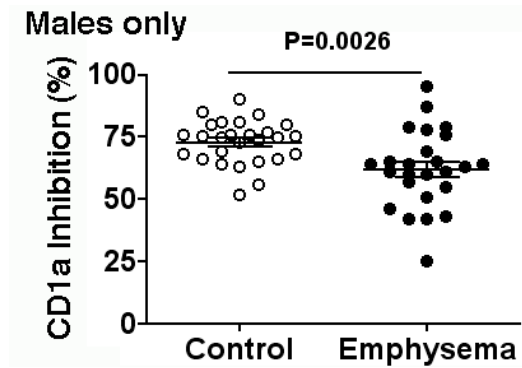

**Figure S9. The difference in CD1a inhibition in male smokers with and without emphysema.** Human monocytes were isolated from PBMC and cultured for three days with human GM-CSF and human IL-4 in complete medium containing 10% FBS to induce DC differentiation. Cell culture was supplemented with 10% human plasma from male control (N=17) or smokers with emphysema (N=14). Percent CD1a inhibition was calculated using the formula: Inhibition (%)=(V-P)/V, where V represents percentage of CD1a in Vehicle treated group and P represents percentage of CD1a in plasma treated group. \*P=0.0026 as determined by the Mann-Whitney test.

| Characteristics              | Control | Emphysema |
|------------------------------|---------|-----------|
| No. (male)                   | 35 (17) | 35(27)    |
| Age (mean±SD)                | 58±11   | 65±7      |
| % Low attenuation area (LAA) | 3.1±2   | 21.3±11   |
| Lung Function                |         |           |
| % FEV1(mean±SD)              | 101±14  | 64±19     |
| GOLD stages                  | 0       | I-IV      |
| Smoking Status (No.)         |         |           |
| Former                       | 20      | 21        |
| Current                      | 15      | 14        |
| PPY (mean±SD)                | 41±38   | 64±32     |

**Table S1 Demographics of study participants.**

No., number; SD, Standard Deviation; % LAA: low attenuation area or emphysema; %FEV1, Forced Expiratory Volume in 1 second % predicted; GOLD, Global initiative Obstructive Lung Disease; PPY, pack per year or the number of packs of cigarette smoked per day multiplied by the number of smoking in years.
